# Supplementary material for: Haloperoxidase-mimicking CeO2−xnanorods for the deactivation of human coronavirus OC43
Source: Royal Society of Chemistry journal article supplement (doi:10.1039/d1nr06966g), 2022-01-01
Supplement: d1nr06966g1.pdf [file d1nr06966g1.pdf]

## 1 **Supporting Information**

2

### 3 **Experimental Section**

4 **Hydrothermal synthesis of cerium oxide nanorods.** An aqueous solution of NaOH  
5 (14 mL, 1M, 5M or 9 M) was directly poured into a rapidly stirred solution of cerium  
6 (III) nitrate hexahydrate (2 mL, 0.52 g, 0.4 M) ( $\text{Ce}(\text{NO}_3)_3 \cdot 6\text{H}_2\text{O}$ , 99.95% metals basis,  
7 Sigma-Aldrich) in MilliQ-water. After being heavily stirred for 30 min, the lilac  
8 suspension was transferred into a 25 mL Teflon-lined stainless-steel autoclave and  
9 heated to 100 °C for 24 hours. The lilac product was separated from the turbid  
10 suspension by centrifugation (10000 rpm, 10 min), washed five times with MilliQ-  
11 water (50 mL each) until the pH reached 7. After drying at 60 °C overnight, the resulting  
12 yellow product was carefully hand ground. The obtained  $\text{CeO}_{2-x}$  nanorods were  
13 suspended in MilliQ-water (1 mg/mL) by sonication (a few seconds) and stirred directly  
14 at room temperature before use.

15

16 **Transmission electron microscopy (TEM) analysis.** The TEM samples were  
17 prepared by dispersing the nanoparticle powders in water, placing a droplet onto a  
18 carbon coated copper grid and drying at ambient temperature. The FEI Tecnai  
19 Biotwin TEM (U.S.A) was used to observe the morphology of the  $\text{CeO}_{2-x}$  nanorods.  
20 The length and width of the  $\text{CeO}_{2-x}$  nanorods were measured using Image J. For each  
21 sample, the total number of nanoparticles counted was 150.

22

23 **Dynamic Light Scattering (DLS).** The surface charge (zeta-potential, mV) of  $\text{CeO}_{2-x}$   
24 nanorods were determined using a ZetaSizer Nano series Nano-ZS (Zetasizer Nano  
25 ZS90, Malvern, UK), performed at 25 °C for samples appropriately diluted in PBS.

26

27 **Powder X-ray diffraction patterns (XRD).** X-ray diffractograms of the samples were  
28 obtained with a step size of 0.0025° on a Bruker D8 Advance ECO powder  
29 diffractometer (Germany) diffractometer using  $\text{Cu K}_\alpha$  radiation. The data were  
30 collected with a scan rate of 0.02°/s and a  $2\theta$  ranging from 20° to 80° at ambient  
31 temperature. All peaks of XRD patterns were indexed to a fluorite-type  $\text{CeO}_2$  (space  
32 group: Fm3m, JCPDS 34-394).

33

34 **X-ray photoelectron spectroscopy (XPS).** Samples were analyzed using a Scienta  
35 Omicron ESCA-2SR with operating pressure ca.  $1 \times 10^{-9}$  Torr. Monochromatic Al  $\text{K}_\alpha$   
36 x-rays (1486.6 eV) were generated at 250W (15 kV; 20mA) with photoelectrons  
37 collected from a 2 mm diameter analysis spot. Photoelectrons were collected at a 0°  
38 emission angle with source to analyzer angle of 54.7°. A hemispherical analyzer  
39 determined electron kinetic energy, using a pass energy of 200 eV for wide/survey  
40 scans, and 50 eV for high resolution scans. A flood gun was used for charge  
41 neutralization of non-conductive samples. All binding energies were referenced to the

42 binding energy of C (1s, 284.8 eV). Deconvolution of the XPS spectra was carried out  
43 using XPSPEAK (version 4.1) software. The complex signals were deconvoluted into  
44 10 peaks with respect to physical constrains arising from the final-state occupation of  
45 the Ce 4f level, namely 3d<sub>3/2</sub> (910-895eV) and 3d<sub>5/2</sub> (895-875 eV) spin-orbit coupling (3d  
46 multiplet splitting assigned to 18.5 ± 0.5 eV), ratio of intensities (3:2), iterative Shirley  
47 (background) and a Gauss/Lorenz peak type. The concentrations of Ce<sup>3+</sup> and Ce<sup>4+</sup> were  
48 calculated by the following equations:

$$49 \text{Concentration (Ce}^{3+}) = \frac{ACe^{3+}}{ACe^{3+} + ACe^{4+}} \times 100$$

$$50 \text{Concentration (Ce}^{4+}) = \frac{ACe^{4+}}{ACe^{3+} + ACe^{4+}} \times 100$$

51 *A* is the integrated area of peak according to Ce<sup>3+</sup> and Ce<sup>4+</sup>.

52

53 **Phenol red assay.** The catalytic activity of the CeO<sub>2-x</sub> nanorods was determined by the  
54 bromination of phenol red described by Tremel *et al*<sup>1</sup>. For each assay, it contains phenol  
55 red (PR, 25 μM), potassium bromide (KBr, 10 mM), Hydrogen peroxide (H<sub>2</sub>O<sub>2</sub>, 10  
56 μM). The assay was performed for 10 min at 37°C in 5 mM MES buffer (pH 6.0) by  
57 varying the types of nanorods (R=1, R=4.5, R=9). For each measurement, blank tests  
58 and controls were performed, each measurement was carried out 3 times.

59 To get the kinetic parameters, two independent sets of experiments were performed of  
60 cerium nanorods (R=1, R=4.5, R=9) in MES buffer (5 mM, pH 6.0 with 25 μM phenol  
61 red). (1) H<sub>2</sub>O<sub>2</sub> concentration was varied (0-1000 μM) while keeping constant the  
62 concentrations of Br<sup>-</sup> (10 mM) and CeO<sub>2-x</sub> (0.04 mg/mL). (2) Br<sup>-</sup> concentration was  
63 varied (0-80 mM) while keeping constant the concentrations of H<sub>2</sub>O<sub>2</sub> (250 μM) and  
64 CeO<sub>2-x</sub> (0.04 mg/mL). To evaluate the kinetic parameters with respect to the Br<sub>4</sub>PR  
65 concentration, the dA<sub>592nm</sub>/dt values were converted to the equivalent d[Br<sub>4</sub>PR]/dt  
66 values using the Lambert-Beer law with an extinction coefficient of Br<sub>4</sub>PR (ε<sub>Br<sub>4</sub>PR</sub>)  
67 determined to be 72200 M<sup>-1</sup>cm<sup>-1</sup>. The values were fit to the Michaelis-Menten model  
68 and kinetic parameters (*K<sub>m</sub>*, *V<sub>max</sub>*) were determined by Lineweaver-Burk linearization.  
69

70 **Human cell line and virus culture.** HCT-8 colon epithelial cells (ATCC®CCL-  
71 244™) and H-CoV-OC43 (ATCC®VR1558™) were purchased from American Type  
72 Culture Collection (ATCC). HCT-8 cells were maintained in Dulbecco's Modified  
73 Eagle Medium (DMEM) (Corning, USA) with 10% fetal bovine serum (FBS) (Gibco,  
74 USA) and 1% penicillin/streptomycin (Gibco, USA). The cells were grown as  
75 monolayers at 37 °C with 5% CO<sub>2</sub>. H-CoV-OC43 was grown and propagated in HCT-  
76 8 cells at 33 °C with 5% CO<sub>2</sub> in DMEM with 2% FBS and 1% penicillin/streptomycin.  
77 The incubation temperature, i.e., 33°C, was chosen as it reflects the physiological  
78 condition of the nasopharynx, where the virus OC43 was discovered<sup>2</sup>. This incubation  
79 condition has been validated by the American Type Culture Collection (ATCC, see  
80 <https://www.atcc.org/products/vr-1558>), which considered 33°C to be ideal for the  
81 replication of OC43 and its infectivity assays. Infected cells were lysed 8 days post-

82 infection by two freeze-thaw cycles. The virus-containing fluid was cleared by  
83 centrifugation, aliquoted and stored at -80 °C.

84

85 **50% tissue culture infection dose (TCID<sub>50</sub>).** Virus titers were tested by TCID<sub>50</sub> assay.  
86 HCT-8 cells (2 x10<sup>4</sup> cells/well) were cultured in 96-well plates. Suspensions of OC43  
87 (10<sup>6.5</sup>TCID<sub>50</sub>/mL) were incubated with different formulations for 15 minutes. The  
88 CeO<sub>2-x</sub> nanorods were removed by centrifuge at 5000 g for 10 minutes. The incubated  
89 virus suspensions were subsequently collected and then were serially diluted (in 10-  
90 fold steps) from 10<sup>-2</sup> to 10<sup>-10</sup> and inoculated into confluent HCT-8 cell monolayers and  
91 incubated under 33 °C for 2 hours. After 2 hours, the monolayer was rinsed with PBS,  
92 overlaid with medium (2% FBS in DMEM) and incubated at 33 °C. Viral cytopathic  
93 effects were examined at day 6 using an inverted microscope. The final titer was  
94 calculated as described previously.<sup>3</sup>

95

96 **Immunofluorescence Assay (IFA).** For the IFA assay, HCT-8 cells (5 x10<sup>4</sup> cells/well)  
97 were cultured into a 3.5-mm glass bottom dish (Cellvis). Suspensions of OC43  
98 (10<sup>6.5</sup>TCID<sub>50</sub>/mL) were incubated with different formulations for 15 minutes. The  
99 CeO<sub>2-x</sub> nanorods were removed by centrifuge at 5000 g for 10 minutes. The incubated  
100 virus suspensions were subsequently collected and then infected with HCoV-OC43 at  
101 a multiplicity of infection (MOI) of 0.5 and incubated at 33°C for 48 hours. After 48  
102 hours, HCT-8 cells were fixed with 4% paraformaldehyde (PFA). The fixed cells were  
103 washed twice with PBS and permeabilized with 0.5% Triton X-100 for 10 minutes at  
104 room temperature. Afterwards, samples were blocked for 45 mins at room temperature  
105 in 5% goat serum in PBS and incubated for overnight at 4 °C with primary anti-HCoV-  
106 OC43 S antibodies (Cusabio, diluted 1:500 into PBS containing 3% goat serum).  
107 Subsequently, samples were incubated for 1 hour with Alexa Fluor 568-labeled goat  
108 anti-rabbit IgG (Thermo Fisher Scientific, diluted 1:1000 in PBS). Nuclei were stained  
109 with Hoechst 33258 (Thermo Fisher Scientific) for minutes. After immunostaining, in  
110 all the cases, cells were washed with 0.5% TWEEN-20 in PBS. Finally, stained cultures  
111 were mounted on glass slides in ProLong Diamond antifade medium (Thermo Fisher  
112 Scientific) and stored at 4 °C. The infection rate (%) was calculated by the following  
113 equation. For each sample, cells were counted in five different fields.

$$114 \quad \% \text{ of infected cells} = \frac{OC\ 43\ positive\ cell\ number}{Total\ cell\ number\ (Hoechst)} \times 100$$

115

116 **Cell Counting Kit-8 for Cytotoxicity studies.** HCT-8 cells were seeded in 96-well  
117 plates (Corning Costar, USA) at a density of 1 × 10<sup>4</sup> cells/well and overnight at 33 °C  
118 in a humidified 5% CO<sub>2</sub>-containing atmosphere. Cells were then exposed to the CeO<sub>2</sub>-  
119 <sub>x</sub> nanorods or formulations containing CeO<sub>2-x</sub> nanorods (of various concentrations in  
120 the range of 0.005 to 0.32 mg/mL), 1 mM Br<sub>2</sub>, and 10 mM H<sub>2</sub>O<sub>2</sub> for 72 hours. Viability  
121 of the treated or untreated cells were quantified using a cell counting kit-8 (CCK-8 kit;  
122 Dojindo Molecular Technologies, Japan). After incubating cells with the CCK-8 kit

123 reagents for 1-2 hours, the absorbance of each well at 450 nm was measured. Empty  
124 wells with CCK-8 assay reagents only were used as blanks and were subtracted from  
125 the final reading. Relative cell viability was calculated by normalizing the absorbance  
126 readings using that of untreated cells. All assays were carried out in quintuplicate.

127

128 **LIVE/DEAD staining for Cytotoxicity studies.** Once seeded HCT-8 cells in 96 well  
129 plates (Corning Costar, USA) at a density of  $1 \times 10^4$  cells/well, the CeO<sub>2-x</sub> nanorods or  
130 formulations containing CeO<sub>2-x</sub> nanorods (of various concentrations in the range of  
131 0.005 to 0.32 mg/mL), 1 mM Br<sup>-</sup>, and 10 mM H<sub>2</sub>O<sub>2</sub> were introduced into the cells and  
132 then incubated for 24 hours. A LIVE/DEAD Viability/Cytotoxicity Kit (Molecular  
133 Probes, Invitrogen, USA) was used to test the cell survival rate. Cells were then  
134 incubated with calcein-AM (acetoxymethyl) (1 mM) and ethidium homodimer-1 (2  
135 mM) for 30 min at 37°C to label live and dead cells, respectively. Images of cells were  
136 taken by using confocal microscopy and the numbers of live and dead cells were  
137 counted by using ImageJ. Cell survival rate (%) was then calculated as Live Cells/(Live  
138 Cells + Dead Cells)  $\times$  100.

139

140 **Lactate dehydrogenase (LDH) assay for Cytotoxicity studies.** HCT-8 cells were  
141 seeded in 96 well plates (Corning Costar, USA) at a density of  $1 \times 10^4$  cells/well and  
142 cultured overnight. The LDH toxicity assay kit (Cayman Chemical, USA) was used as  
143 an indicator of cell membrane integrity and thus a measurement of cytotoxicity. In  
144 short, Triton X-100 and Assay Buffer were added into wells in triplicate as a group of  
145 maximum release and a group of spontaneous release according to the manufacture's  
146 specifications. In addition, the CeO<sub>2-x</sub> nanorods or formulations containing CeO<sub>2-x</sub>  
147 nanorods (of various concentrations in the range of 0.005 to 0.32 mg/mL), 1 mM Br<sup>-</sup>,  
148 and 10 mM H<sub>2</sub>O<sub>2</sub> were introduced into the cells as a testing group. The plate was  
149 incubated at 37°C for 12 hours. After that, 100  $\mu$ L of cell supernatant in each well was  
150 transferred to a new 96-well plate containing 100  $\mu$ L of LDH Reaction Solution in each  
151 well. The new plate was then incubated with gentle shaking for 30mins at 37°C. The  
152 final absorbance was measured at 490 nm. All experiments were performed in  
153 quintuplicate. The % cytotoxicity was calculated as [(Experimental Value A490 -  
154 Spontaneous Release A490)/(Maximum Release A490 - Spontaneous Release  
155 A490)]\*100.

156

157 **Statistical Analysis.** Data were analyzed using GraphPad Prism 7.0 software and  
158 presented as mean  $\pm$  SD. Student's t test or one-way ANOVA followed by Tukey's  
159 HSD test was applied for comparisons between two groups or among multiple groups.

160

161

162 **References**

- 163 1. K. Herget, P. Hubach, S. Pusch, P. Deglmann, H. Götz, T. E. Gorelik, I. y. A.  
164 Gural'skiy, F. Pfitzner, T. Link, S. Schenk, M. Panthöfer, V. Ksenofontov, U.  
165 Kolb, T. Opatz, R. André and W. Tremel, *Adv. Mater.*, 2017, **29**, 1603823.
- 166 2. T. Keck, R. Leiacker, H. Riechelmann and G. Rettinger, *Laryngoscope*, 2000,  
167 **110**, 651-654.
- 168 3. M. Lock, M. Korn, J. Wilson, M. Sena-Esteves and G. Gao, *Cold Spring Harb.*  
169 *Protoc.*, 2019, **2019**.
- 170

## Supporting Information

### Figures

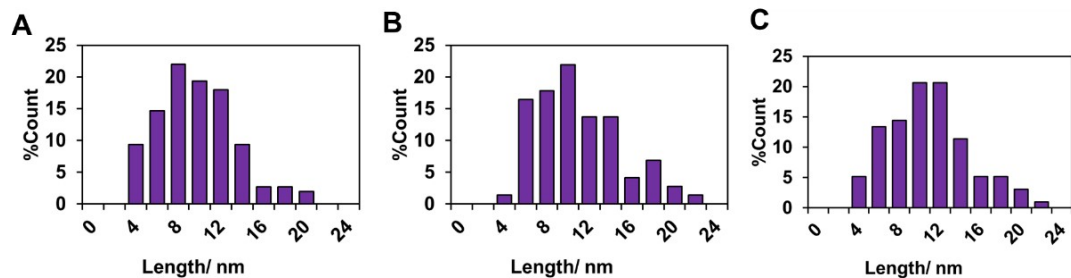

**Fig. S1. Width distribution of CeO<sub>2-x</sub> nanorods based on the TEM image analysis.**

A) R=1, B) R=4.5, C) R=9. The total number of nanoparticles counted was 150.

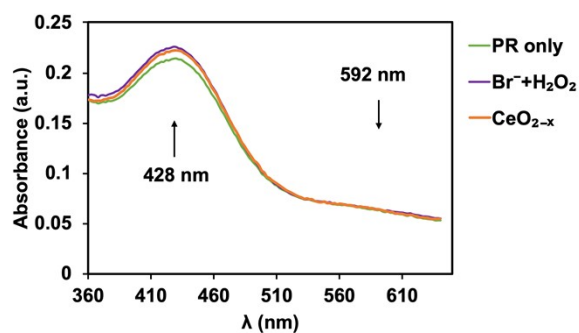

**Fig. S2. UV-vis spectra of phenol red bromination assay.**

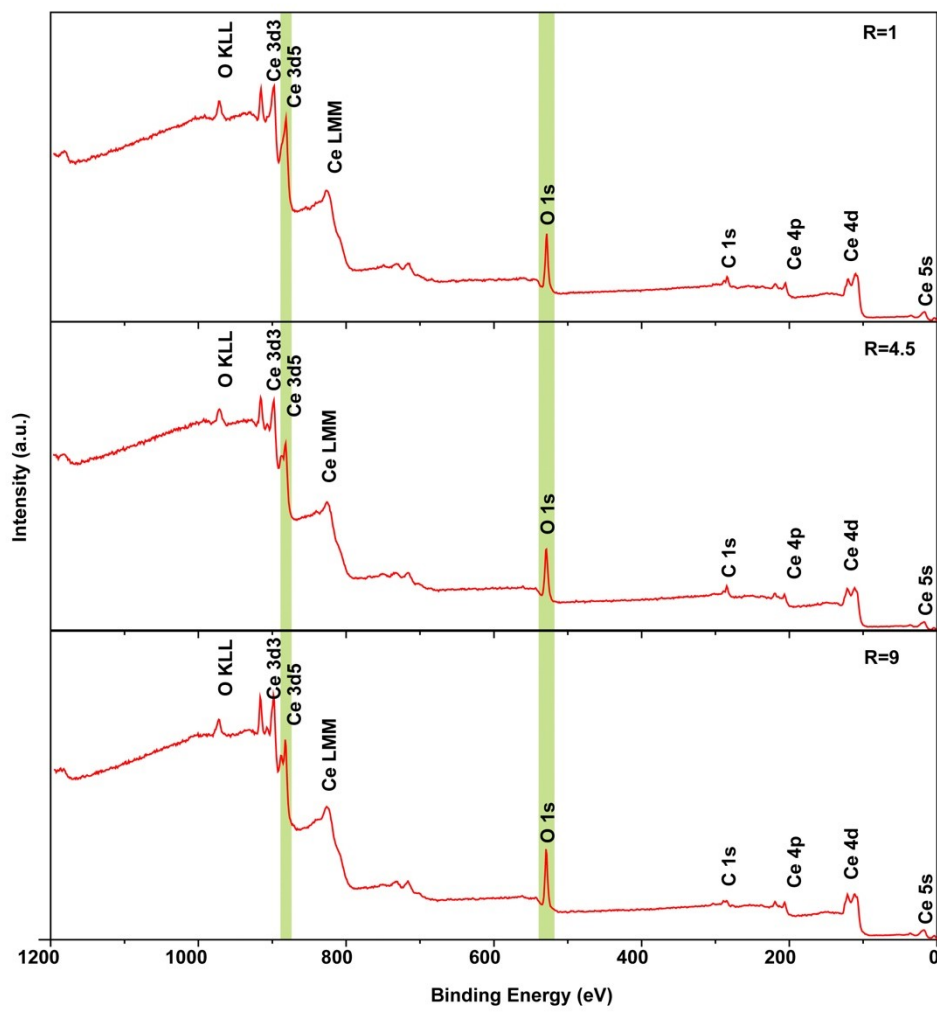

**Fig. S3. XPS survey spectra of CeO<sub>2-x</sub> nanorods. The Ce 3d and O 1s were highlighted (green).**

**Tables.**

**Table S1. Size distributions and zeta potential of the CeO<sub>2-x</sub> nanorods/nanotubes with different aspect ratios.**

| Ratio (R = Length/width) | R=1         | R=4.5       | R=9         |
|--------------------------|-------------|-------------|-------------|
| Length (nm)              | 7.5 ± 2.5   | 46.0 ± 17.9 | 86.9 ± 40.1 |
| Width (nm)               | 11.2 ± 4.7  | 11.9 ± 4.0  | 12.0 ± 2.5  |
| Zeta potential (mV)      | -14.6 ± 0.6 | -13.6 ± 0.6 | -13.6 ± 2.0 |

**Table S2. Content of the Ce(III) and Ce(IV) surface sites in the CeO<sub>2-x</sub> nanorods/nanotubes.**

|       | % Ce(III) | % Ce(IV) |
|-------|-----------|----------|
| R=1   | 33.4      | 66.6     |
| R=4.5 | 47.1      | 52.8     |
| R=9   | 33.2      | 66.8     |

**Table S3. The kinetic parameters for the CeO<sub>2-x</sub> nanoparticles.**

| R ratio | Substrate                     | K <sub>m</sub> (mM)     | V <sub>max</sub> (mM min <sup>-1</sup> ) |
|---------|-------------------------------|-------------------------|------------------------------------------|
| R=1     | Br <sup>-</sup>               | 206.9 × 10 <sup>3</sup> | 3.35                                     |
|         | H <sub>2</sub> O <sub>2</sub> | 408.8                   | 1.21                                     |
| R=4.5   | Br <sup>-</sup>               | 17.9 × 10 <sup>3</sup>  | 2.53                                     |
|         | H <sub>2</sub> O <sub>2</sub> | 35.0                    | 2.21                                     |
| R=9     | Br <sup>-</sup>               | 13.54 × 10 <sup>3</sup> | 1.42                                     |
|         | H <sub>2</sub> O <sub>2</sub> | 41.81                   | 0.96                                     |

Parameters obtained using the Lineweaver-Burk linearization.
